# Supplementary material for: COVID-19 Severity and Survival over Time in Patients with Hematologic Malignancies: A Population-Based Registry Study
Source: MDPI journal article supplement (doi:10.3390/cancers15051497), 2023-02-27

## **RESEARCH**

### **COVID-19 severity and survival over time in patients with hematologic malignancies: a population-based registry study**

#### **Supplementary file S1 (.pdf)**

##### **Supplementary Table S1.**

**Patient characteristics, hematologic malignancy and therapy received, and clinical severity of COVID-19 and treatment received according to time of diagnosis (early cohort, 1<sup>st</sup> wave, March-June 2020; later cohort, 2<sup>nd</sup>/3<sup>rd</sup> wave, July 2020-February 2021) in the total study population (N = 1166) and all inpatients (N = 896)**

##### **Supplementary Figure S1. Survival estimates by HM features.**

Survival estimates through day 120 according to (A) type of HM, (B) HM treatment status, (C) type of HM treatment, and (D) transplantation status. *P* values for comparisons between groups were determined by log rank test, with Šidák correction for multiple comparisons; there were no significant differences between groups in any analysis after correction, except for between patients receiving autologous ( $P < .0001$ ) or allogeneic ( $P = .0003$ ) stem cell transplantation and those not receiving stem cell transplantation.

## Supplementary Material

**Supplementary Table S1. Patient characteristics, hematologic malignancy and therapy received, and clinical severity of COVID-19 and treatment received according to time of diagnosis (early cohort, 1<sup>st</sup> wave, March-June 2020; later cohort, 2<sup>nd</sup>/3<sup>rd</sup> wave, July 2020-February 2021) in the total study population (N = 1166) and all inpatients (N = 896)**

|                                        | Total study population |                           |                           |                        | Inpatients         |                           |                           |                        |
|----------------------------------------|------------------------|---------------------------|---------------------------|------------------------|--------------------|---------------------------|---------------------------|------------------------|
|                                        | Total<br>(N = 1166)    | Early cohort<br>(n = 769) | Later cohort<br>(n = 397) | Odds ratio<br>(95% CI) | Total<br>(N = 896) | Early cohort<br>(n = 681) | Later cohort<br>(n = 215) | Odds ratio<br>(95% CI) |
| <b>Age, y</b>                          | <b>N = 1147</b>        | <b>n = 767</b>            | <b>n = 380</b>            |                        | <b>N = 888</b>     |                           | <b>n = 207</b>            |                        |
| Median (IQR)                           | 71 (59-79)             | 72 (60-79)                | 70 (58-78)                |                        | 72 (63-80)         | 72 (62-80)                | 72 (64-80)                |                        |
| Age 18-59 y, n (%)                     | 287 (25.0)             | 183 (23.9)                | 104 (27.4)                | reference              | 177 (19.9)         | 141 (20.7)                | 36 (17.4)                 | reference              |
| Age ≥60 y, n (%)                       | 860 (75.0)             | 584 (76.1)                | 276 (72.6)                | 0.83 (0.63-1.10)       | 711 (80.1)         | 540 (79.3)                | 171 (82.6)                | 1.24 (0.83-1.86)       |
| <b>Sex, n (%)</b>                      | <b>N = 1152</b>        | <b>n = 756</b>            | <b>n = 396</b>            |                        | <b>N = 884</b>     | <b>n = 669</b>            |                           |                        |
| Female                                 | 454 (39.4)             | 296 (39.2)                | 168 (42.4)                | reference              | 348 (39.4)         | 259 (38.7)                | 89 (41.4)                 | reference              |
| Male                                   | 698 (60.6)             | 460 (60.8)                | 228 (57.6)                | 1.15 (0.89-1.47)       | 536 (60.6)         | 410 (61.3)                | 126 (58.6)                | 1.12 (0.82-1.53)       |
| <b>Comorbidities</b>                   | <b>N = 1166</b>        | <b>n = 769</b>            | <b>n = 397</b>            |                        |                    |                           |                           |                        |
| Cardiac disease, n (%)                 | 241 (20.7)             | 160 (20.8)                | 81 (20.4)                 | 0.98 (0.72-1.32)       | 198 (22.1)         | 150 (22.0)                | 48 (22.3)                 | 1.02 (0.70-1.47)       |
| Respiratory disease, n (%)             | 171 (14.7)             | 116 (15.1)                | 55 (13.9)                 | 0.91 (0.64-1.28)       | 141 (15.7)         | 105 (15.4)                | 36 (16.7)                 | 1.11 (0.73-1.67)       |
| Renal disease, n (%)                   | 127 (10.9)             | 85 (11.1)                 | 42 (10.6)                 | 0.95 (0.64-1.41)       | 110 (12.3)         | 81 (11.9)                 | 29 (13.5)                 | 1.16 (0.73-1.82)       |
| Diabetes, n (%)                        | 200 (17.2)             | 136 (17.7)                | 64 (16.1)                 | 0.89 (0.65-1.24)       | 175 (19.5)         | 128 (18.8)                | 47 (21.9)                 | 1.21 (0.83-1.76)       |
| Hypertension, n (%)                    | 453 (38.9)             | 315 (41.0)                | 138 (34.8)                | 0.77 (0.60-0.99)       | 382 (42.6)         | 294 (43.2)                | 88 (40.9)                 | 0.91 (0.67-1.25)       |
| BMI > 35, n (%)                        | 56 (4.8)               | 38 (4.9)                  | 18 (4.5)                  | 0.91 (0.51-1.62)       | 49 (5.5)           | 36 (5.3)                  | 13 (6.1)                  | 1.15 (0.60-2.22)       |
| Number of above 6 comorbidities, n (%) |                        |                           |                           |                        |                    |                           |                           |                        |
| 0                                      | 314 (26.9)             | 187 (24.3)                | 127 (32.0)                | reference              | 208 (23.2)         | 146 (21.4)                | 62 (28.8)                 | reference              |
| ≥1                                     | 852 (73.1)             | 582 (75.7)                | 270 (68.0)                | 0.68 (0.52-0.89)       | 49 (5.5)           | 36 (5.3)                  | 13 (6.1)                  | 0.68 (0.48-0.95)       |
| Other comorbidities, n (%)             | 538 (46.1)             | 400 (52.0)                | 138 (34.8)                | 0.49 (0.38-0.63)       | 450 (50.2)         | 372 (54.6)                | 78 (36.3)                 | 0.47 (0.35-0.65)       |
| <b>Hematologic malignancy, n (%)</b>   | <b>N = 1166</b>        | <b>n = 769</b>            | <b>n = 397</b>            |                        |                    |                           |                           |                        |
| Lymphoid malignancy                    | 839 (72.0)             | 541 (70.4)                | 298 (75.1)                | reference              | 626 (69.9)         | 474 (69.6)                | 152 (70.7)                | reference              |
| Myeloid malignancy                     | 327 (28.0)             | 228 (29.6)                | 99 (24.9)                 | 0.49 (0.38-0.63)       | 270 (30.1)         | 207 (30.4)                | 63 (29.3)                 | 0.95 (0.68-1.33)       |
| NHL                                    | 325 (27.9)             | 212 (27.6)                | 113 (28.5)                | reference              | 249 (27.8)         | 189 (27.8)                | 60 (27.9)                 | reference              |
| MM                                     | 283 (24.3)             | 162 (21.1)                | 121 (30.5)                | 1.17 (0.84-1.64)       | 188 (21.0)         | 146 (21.4)                | 42 (19.5)                 | 0.91 (0.58-1.42)       |
| CLL                                    | 175 (15.0)             | 124 (16.1)                | 51 (12.8)                 | 0.77 (0.52-1.15)       | 138 (15.4)         | 103 (15.1)                | 35 (16.3)                 | 1.07 (0.66-1.73)       |

|                                                       | Total study population |                           |                           |                        | Inpatients         |                           |                           |                        |
|-------------------------------------------------------|------------------------|---------------------------|---------------------------|------------------------|--------------------|---------------------------|---------------------------|------------------------|
|                                                       | Total<br>(N = 1166)    | Early cohort<br>(n = 769) | Later cohort<br>(n = 397) | Odds ratio<br>(95% CI) | Total<br>(N = 896) | Early cohort<br>(n = 681) | Later cohort<br>(n = 215) | Odds ratio<br>(95% CI) |
| HL                                                    | 50 (4.3)               | 31 (4.0)                  | 19 (4.8)                  | 1.15 (0.62-2.13)       | 34 (3.8)           | 27 (4.0)                  | 7 (3.3)                   | 0.81 (0.34-1.97)       |
| ALL                                                   | 26 (2.2)               | 12 (1.6)                  | 14 (3.5)                  | 2.19 (0.98-0.89)       | 17 (1.9)           | 9 (1.3)                   | 8 (3.7)                   | 2.8 (1.04-7.58)        |
| MDS                                                   | 115 (9.9)              | 81 (10.5)                 | 34 (8.6)                  | 0.79 (0.50-1.25)       | 101 (11.3)         | 78 (11.5)                 | 23 (10.7)                 | 0.93 (0.54-1.61)       |
| AML                                                   | 92 (7.9)               | 63 (8.2)                  | 29 (7.3)                  | 0.86 (0.53-1.42)       | 76 (8.5)           | 56 (8.29)                 | 20 (9.3)                  | 1.13 (0.63-2.02)       |
| CML                                                   | 33 (2.8)               | 17 (2.2)                  | 16 (4.0)                  | 1.77 (0.86-3.63)       | 20 (2.2)           | 13 (1.9)                  | 7 (3.2)                   | 1.70 (0.65-4.45)       |
| Ph-MPN                                                | 87 (7.5)               | 67 (8.7)                  | 20 (5.0)                  | 0.56 (0.32-0.97)       | 73 (8.2)           | 60 (8.8)                  | 13 (6.1)                  | 0.68 (0.35-1.33)       |
| <b>Stem cell transplantation,* n (%)</b>              | <b>N = 1127</b>        | <b>n = 746</b>            | <b>n = 381</b>            |                        | <b>N = 868</b>     | <b>n = 660</b>            | <b>n = 208</b>            |                        |
| Autologous                                            | 100 (8.9)              | 58 (7.8)                  | 42 (11.0)                 | 1.53 (1.01-2.33)       | 64 (7.4)           | 44 (6.7)                  | 20 (9.6)                  | 1.57 (0.90-2.73)       |
| Allogeneic                                            | 56 (5.0)               | 29 (3.9)                  | 27 (7.1)                  | 1.97 (1.15-3.38)       | 43 (5.0)           | 26 (3.9)                  | 17 (8.2)                  | 2.26 (1.20-4.26)       |
| No                                                    | 971 (86.2)             | 659 (88.3)                | 312 (81.9)                | reference              | 761 (87.7)         | 590 (89.4)                | 171 (82.2)                | reference              |
| <b>Cancer therapy, within 30 d,<sup>†</sup> n (%)</b> | <b>N = 1162</b>        | <b>n = 766</b>            | <b>n = 396</b>            |                        | <b>N = 894</b>     | <b>n = 679</b>            |                           |                        |
| No active therapy                                     | 483 (41.6)             | 323 (42.2)                | 160 (40.4)                | reference              | 362 (40.5)         | 278 (40.9)                | 84 (39.1)                 | reference              |
| Active therapy                                        | 679 (58.4)             | 443 (57.8)                | 236 (59.6)                | 1.07 (0.84-1.37)       | 532 (59.5)         | 401 (59.1)                | 131 (60.9)                | 1.08 (0.79-1.47)       |
| Conventional chemotherapy                             | 260 (22.4)             | 151 (19.6)                | 109 (27.5)                | 1.46 (1.07-1.99)       | 197 (22.0)         | 140 (20.6)                | 57 (26.5)                 | 1.35 (0.91-2.00)       |
| Low-intensity chemotherapy                            | 71 (6.1)               | 53 (6.9)                  | 18 (4.5)                  | 0.69 (0.39-1.21)       | 58 (6.5)           | 46 (6.8)                  | 12 (5.6)                  | 0.86 (0.44-1.71)       |
| Molecular targeted therapy                            | 130 (11.2)             | 89 (11.6)                 | 41 (10.3)                 | 0.93 (0.61-1.41)       | 106 (11.9)         | 80 (11.8)                 | 26 (12.1)                 | 1.08 (0.65-1.78)       |
| Immunotherapy, mAb only                               | 56 (4.8)               | 43 (5.6)                  | 13 (3.3)                  | 0.61 (0.32-1.17)       | 45 (5.0)           | 37 (5.5)                  | 8 (3.7)                   | 0.72 (0.32-1.60)       |
| Immunomodulator drugs                                 | 71 (6.1)               | 44 (5.7)                  | 27 (6.8)                  | 1.24 (0.74-2.07)       | 51 (5.7)           | 39 (5.7)                  | 12 (5.6)                  | 1.02 (0.51-2.03)       |
| Hypomethylating agents                                | 49 (4.2)               | 33 (4.3)                  | 16 (4.0)                  | 0.98 (0.52-1.83)       | 41 (4.6)           | 30 (4.4)                  | 11 (5.1)                  | 1.21 (0.58-2.53)       |
| Supportive therapy                                    | 31 (2.7)               | 22 (2.9)                  | 9 (2.3)                   | 0.83 (0.37-1.84)       | 26 (2.9)           | 21 (3.1)                  | 5 (2.3)                   | 0.79 (0.29-2.15)       |
| Active, not detailed                                  | 11 (0.9)               | 8 (1.0)                   | 3 (0.8)                   | 0.76 (0.20-2.89)       | 8 (1.5)            | 8 (1.2)                   | 0                         | –                      |
| <b>Pharmacologic therapies for COVID-19, n (%)</b>    | <b>N = 1166</b>        | <b>n = 769</b>            | <b>n = 397</b>            |                        |                    |                           |                           |                        |
| (Hydroxy)chloroquine                                  | 644 (55.2)             | 643 (83.6)                | 1 (0.3)                   | 0.00 (0.00-0.00)       | 602 (67.2)         | 602 (67.2)                | 0                         | 0.00                   |
| Azithromycin                                          | 381 (32.7)             | 348 (45.3)                | 33 (8.3)                  | 0.11 (0.07-0.16)       | 355 (39.6)         | 327 (48.0)                | 28 (13.0)                 | 0.16 (0.11-0.25)       |
| Lopinavir/darunavir                                   | 409 (35.1)             | 409 (53.2)                | 0                         | 0.00 (0.00-0.00)       | 392 (43.8)         | 392 (43.8)                | 0                         | 0.00                   |
| Remdesivir                                            | 77 (6.6)               | 22 (2.9)                  | 55 (13.9)                 | 5.46 (3.28-9.10)       | 77 (8.6)           | 22 (3.2)                  | 55 (25.6)                 | 10.3 (6.1-17.4)        |
| Tocilizumab                                           | 175 (15.0)             | 134 (17.4)                | 41 (10.3)                 | 0.55 (0.38-0.79)       | 175 (19.5)         | 134 (19.7)                | 41 (19.1)                 | 0.96 (0.65-1.42)       |
| Corticosteroids                                       | 626 (53.7)             | 392 (51.0)                | 234 (58.9)                | 1.38 (1.08-1.76)       | 583 (65.1)         | 386 (56.7)                | 197 (91.6)                | 8.36 (5.0-13.9)        |

|                                                                        | Total study population |                           |                           |                        | Inpatients         |                           |                           |                        |
|------------------------------------------------------------------------|------------------------|---------------------------|---------------------------|------------------------|--------------------|---------------------------|---------------------------|------------------------|
|                                                                        | Total<br>(N = 1166)    | Early cohort<br>(n = 769) | Later cohort<br>(n = 397) | Odds ratio<br>(95% CI) | Total<br>(N = 896) | Early cohort<br>(n = 681) | Later cohort<br>(n = 215) | Odds ratio<br>(95% CI) |
| <b>Requirement for oxygen support during COVID-19 treatment, n (%)</b> | <b>N = 1162</b>        | <b>n = 766</b>            | <b>n = 396</b>            |                        | <b>N = 892</b>     | <b>n = 678</b>            | <b>n = 214</b>            |                        |
| No                                                                     | 333 (28.7)             | 161 (21.0)                | 172 (43.4)                | reference              | 110 (12.3)         | 84 (12.4)                 | 26 (12.2)                 | reference              |
| Low-flow oxygen support                                                | 566 (48.7)             | 442 (57.7)                | 124 (31.3)                | 0.26 (0.20-0.35)       | 519 (58.2)         | 431 (63.6)                | 88 (41.1)                 | 0.66 (0.40-1.08)       |
| High-flow oxygen support or mechanical ventilation                     | 263 (22.6)             | 163 (21.3)                | 100 (25.3)                | 0.57 (0.41-0.80)       | 263 (29.5)         | 163 (24.0)                | 100 (46.7)                | 1.98 (1.20-3.29)       |
| <b>Clinical severity of COVID-19, n (%)</b>                            | <b>N = 1131</b>        | <b>n = 760</b>            | <b>n = 371</b>            |                        | <b>N = 886</b>     | <b>n = 677</b>            | <b>n = 209</b>            |                        |
| Mild                                                                   | 254 (22.5)             | 114 (15.0)                | 140 (37.7)                | 2.77 (1.93-3.99)       | 68 (7.7)           | 55 (8.1)                  | 13 (6.2)                  | 0.84 (0.42-1.67)       |
| Moderate                                                               | 254 (22.5)             | 176 (23.2)                | 78 (21.0)                 | reference              | 195 (22.0)         | 152 (22.5)                | 43 (20.6)                 | reference              |
| Severe                                                                 | 408 (36.1)             | 319 (42.0)                | 89 (24.0)                 | 0.63 (0.44-0.90)       | 408 (46.1)         | 319 (47.1)                | 89 (42.6)                 | 0.99 (0.65-1.49)       |
| Critical                                                               | 215 (19.0)             | 151 (19.9)                | 64 (17.3)                 | 0.96 (0.64-1.42)       | 215 (24.3)         | 151 (22.3)                | 64 (30.6)                 | 1.50 (0.96-2.34)       |
| <b>Care setting of COVID-19 treatment, n (%)</b>                       | <b>N = 1166</b>        | <b>n = 769</b>            | <b>n = 397</b>            |                        |                    |                           |                           |                        |
| Outpatient                                                             | 270 (23.2)             | 88 (11.4)                 | 182 (45.8)                | 6.55 (4.87-8.82)       | –                  | –                         | –                         | –                      |
| Inpatient                                                              | 896 (76.8)             | 681 (88.6)                | 215 (54.2)                | reference              | –                  | –                         | –                         | reference              |
| Intensive care unit                                                    | 273 (23.4)             | 170 (22.1)                | 103 (25.9)                | 1.25 (0.94-1.66)       | 273 (30.6)         | 170 (25.1)                | 103 (48.1)                | 2.77 (2.01-3.82)       |

\*Patients who had ever received an autologous or allogeneic stem cell transplant. †Cancer therapy received within 30 days before COVID-19 diagnosis date.

ALL, acute lymphoid leukemia; AML, acute myeloid leukemia; BMI, body mass index; CLL, chronic lymphocytic leukemia; CML, chronic myeloid leukemia; COVID-19, coronavirus disease 2019; HL, Hodgkin lymphoma; IQR, interquartile range; MDS, myelodysplastic syndrome; mAb, monoclonal antibody; MM, multiple myeloma; NHL, non-Hodgkin lymphoma; Ph-MPN, Philadelphia chromosome-negative myeloproliferative neoplasm.

### Supplementary Figure S1. Survival estimates by HM features.

Survival estimates through day 120 according to (A) type of HM, (B) HM treatment status, (C) type of HM treatment, and (D) transplantation status. *P* values for comparisons between groups were determined by log rank test, with Šidák correction for multiple comparisons; there were no significant differences between groups in any analysis after correction, except for between patients receiving autologous ( $P < .0001$ ) or allogeneic ( $P = .0003$ ) stem cell transplantation and those not receiving stem cell transplantation.

**A**

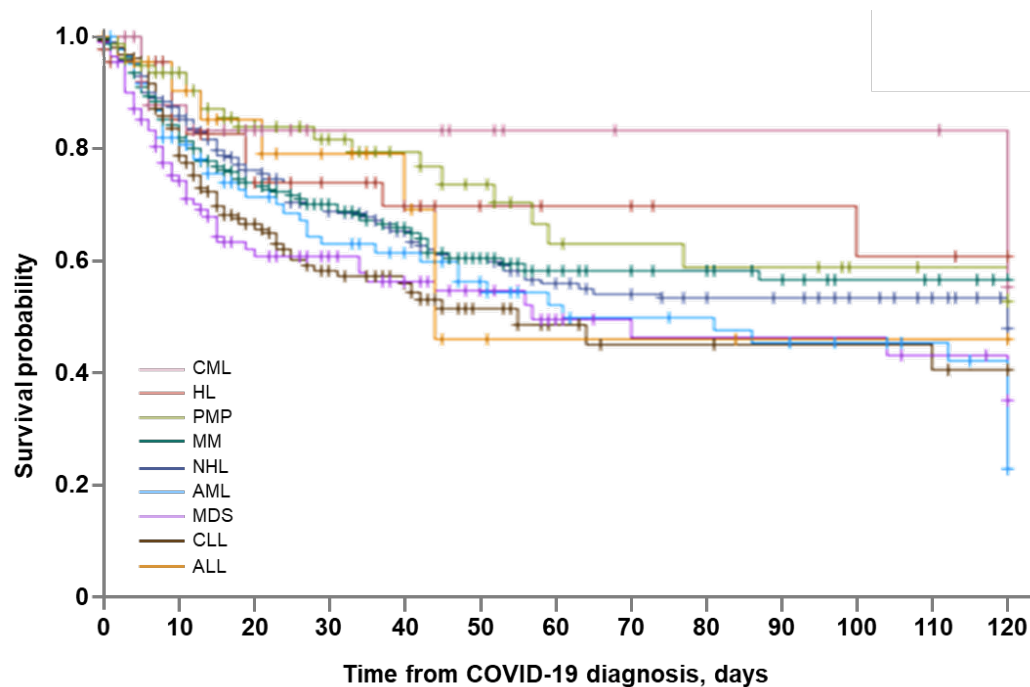

**B**

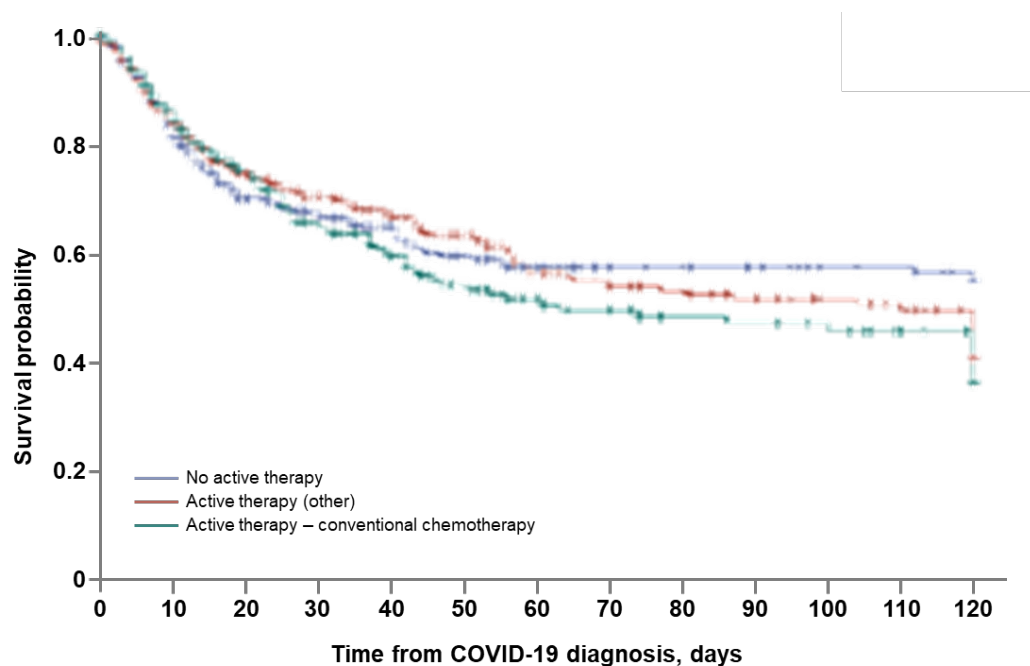

**C**

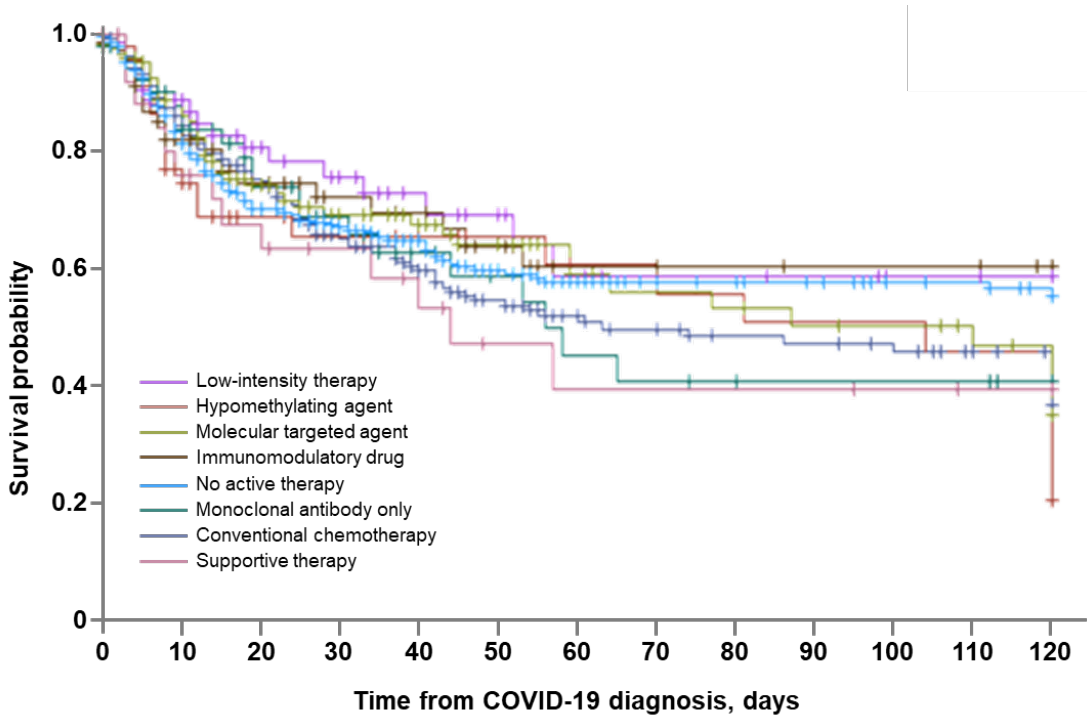

D

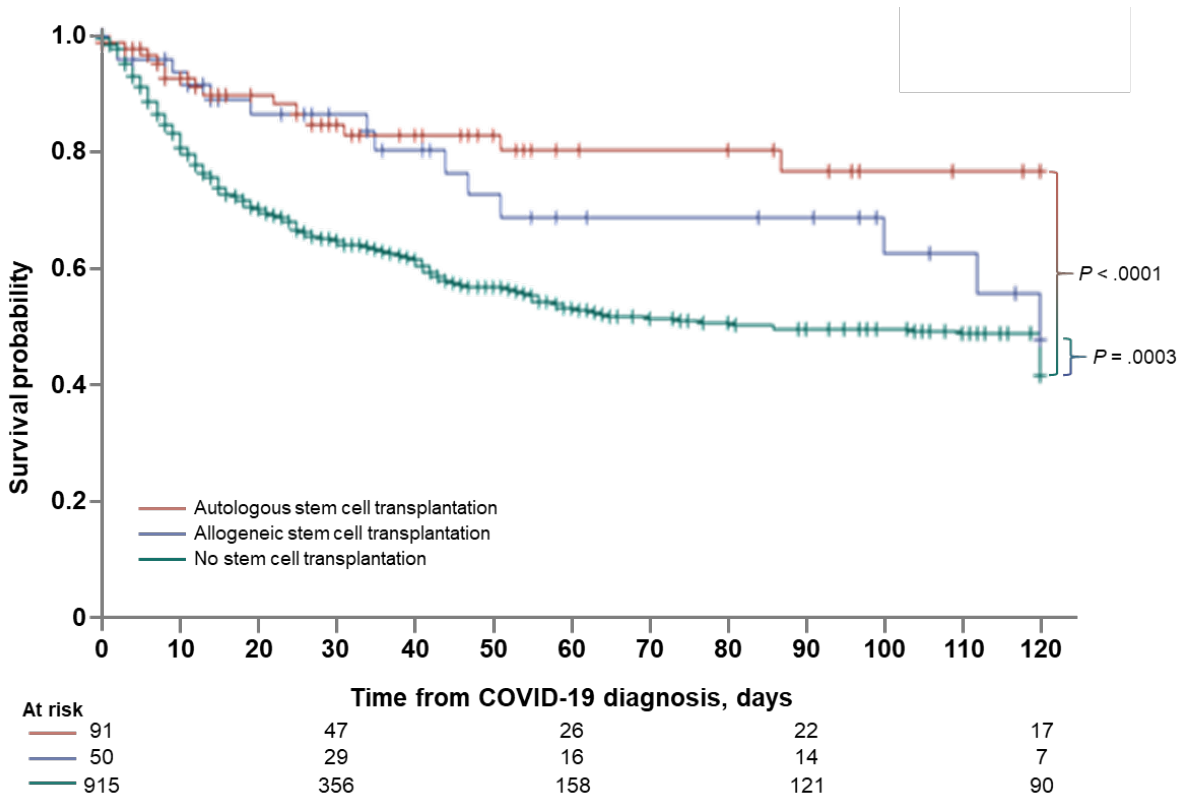

Supplement: s1 [file s1]
